# Supplementary material for: The citrate transporters SLC13A5 and SLC25A1 elicit different metabolic responses and phenotypes in the mouse
Source: PubMed Central journal article supplement (PMC10492862; doi:10.1038/s42003-023-05311-1), 2023-09-09
Supplement: 42003_2023_5311_MOESM2_ESM.pdf [file 42003_2023_5311_MOESM2_ESM.pdf]

## Supplementary Figures

### **The citrate transporters SLC13A5 and SLC25A1 elicit different metabolic responses and phenotypes in the mouse**

Gonzalo Fernandez-Fuente<sup>1,2</sup>, Katherine A. Overmyer<sup>3,4</sup>, Alexis J. Lawton<sup>3,5</sup>, Ildiko Kasza<sup>6</sup>,  
Samantha L. Shapiro<sup>1,2</sup>, Patricia Gallego-Muñoz<sup>7</sup>, Joshua J. Coon<sup>3,4,8</sup>, John M. Denu<sup>3,5</sup>, Caroline  
M. Alexander<sup>6</sup>, Luigi Puglielli<sup>1,2,9,10,\*</sup>

<sup>1</sup>Department of Medicine, University of Wisconsin-Madison, Madison, WI, USA

<sup>2</sup>Waisman Center, University of Wisconsin-Madison, Madison, WI, USA

<sup>3</sup>Department of Biomolecular Chemistry, University of Wisconsin-Madison, Madison, WI, USA

<sup>4</sup>Morgridge Institute for Research, Madison, WI, USA

<sup>5</sup>Wisconsin Institute for Discovery, University of Wisconsin-Madison, Madison, WI, USA

<sup>6</sup>McArdle Laboratory for Cancer Research, University of Wisconsin-Madison, Madison, WI, USA

<sup>7</sup>Department of Cell Biology, Genetics, Histology and Pharmacology, Faculty of Medicine, University of Valladolid, Valladolid, Spain

<sup>8</sup>Department of Chemistry, University of Wisconsin-Madison, Madison, WI, USA

<sup>9</sup>Geriatric Research Education Clinical Center, Veterans Affairs Medical Center, Madison, WI, USA

<sup>10</sup>Department of Neuroscience, University of Wisconsin-Madison, Madison, WI, USA

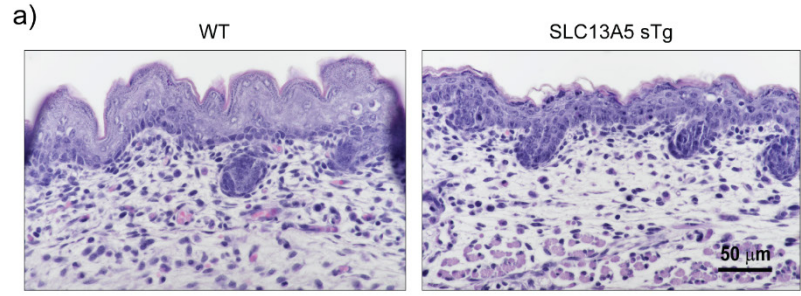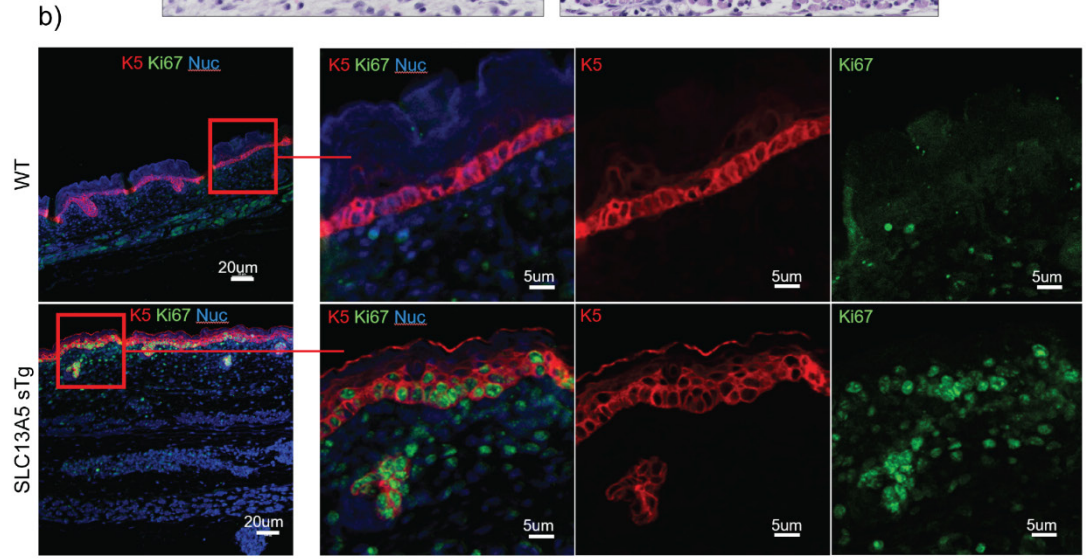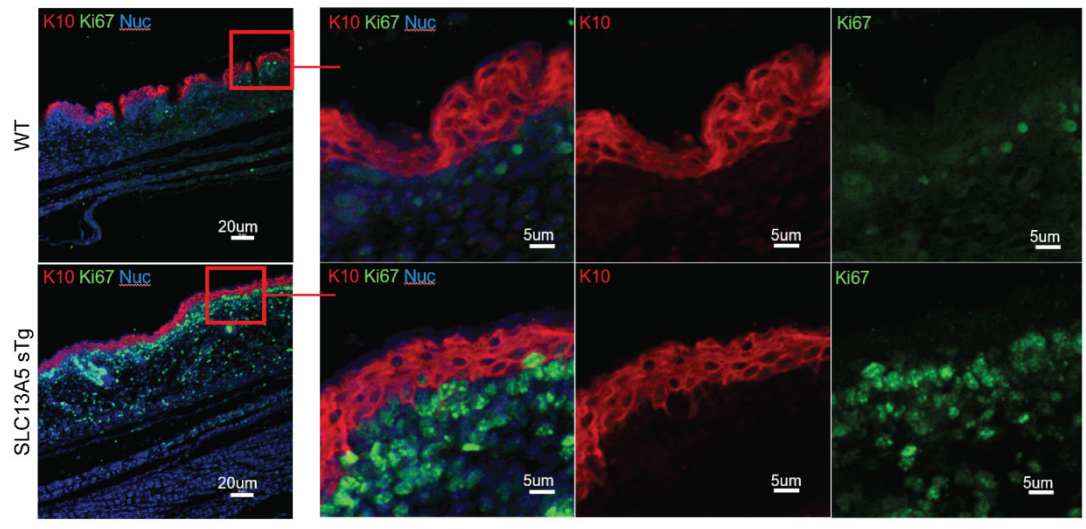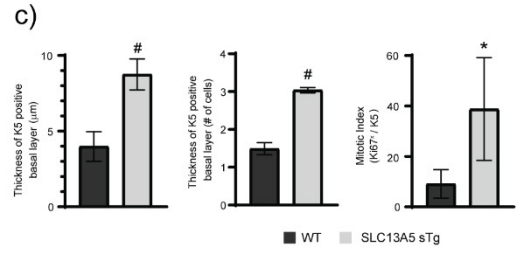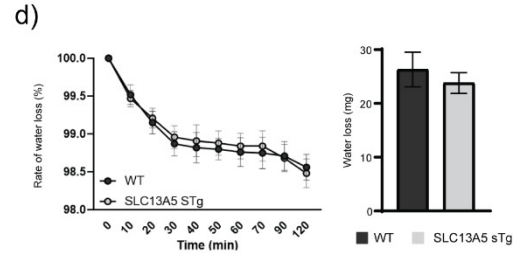

**Supplementary Figure 1.** SLC13A5 sTg<sup>OC</sup> mice display skin defects before birth (E18).

**(a)** Representative H&E staining of skin sections from WT and SLC13A5 sTg<sup>OC</sup> embryos.

**(b)** Immunostaining of 5 $\mu$ m paraffin-embedded skin slices from WT and SLC13A5 sTg<sup>OC</sup> embryos. Keratin 5 (upper panel) and Keratin 10 (lower panel) combined with proliferation marker Ki67 and nuclear staining.

**(c)** Keratin 5 basal layer thickness ( $\mu$ m and number of cells) and Mitotic index (n=3/group).  
\* $P$ <0.05, # $P$ <0.0005 via mean comparison using Student's t-test.

**(d)** Water loss expressed as percentage rate over time and total milligrams (n=8 WT; n=5 SLC13A5 sTg mice).

Cytosolic

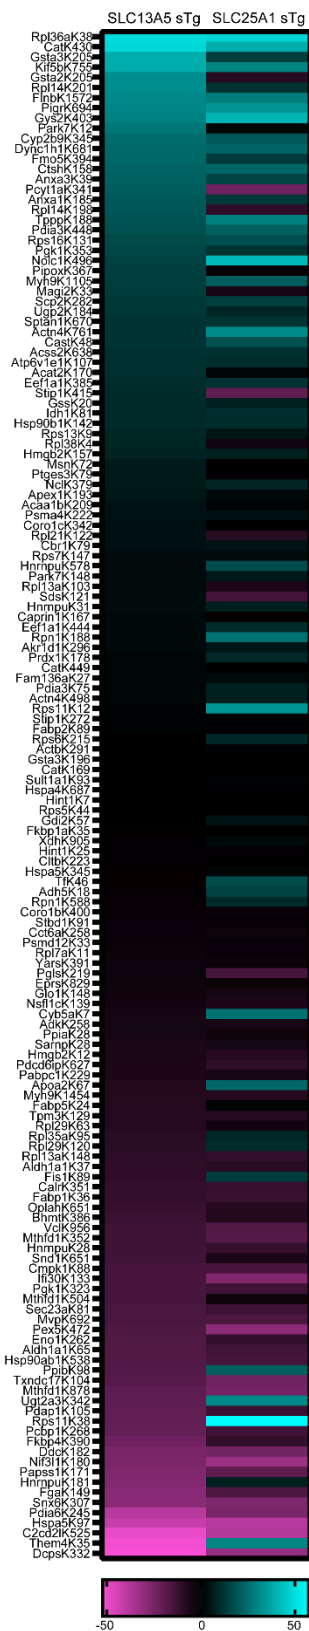

Mitochondria

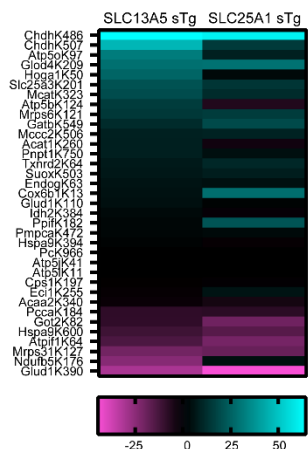

Nucleus

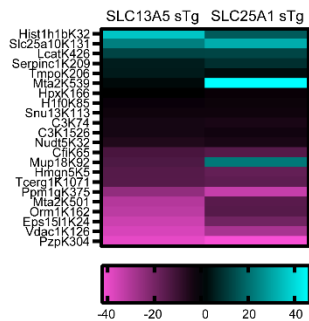

Sec. Pathway

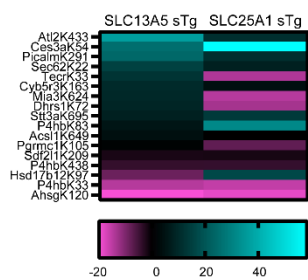

**Supplementary Figure 2.** Heat-maps showing the profile of the 224 overlapping acetylation sites among the cytosolic, mitochondria, nucleus, and secretory pathway fractions found in both SLC13A5 sTg and SLC25A1 sTg mice, as compared to WT littermates. Mice were 2 month-old when analyzed.

a)

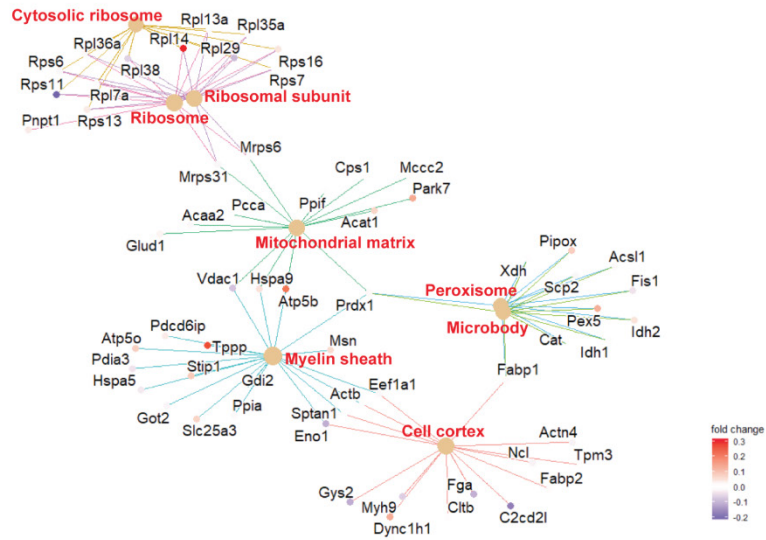

b)

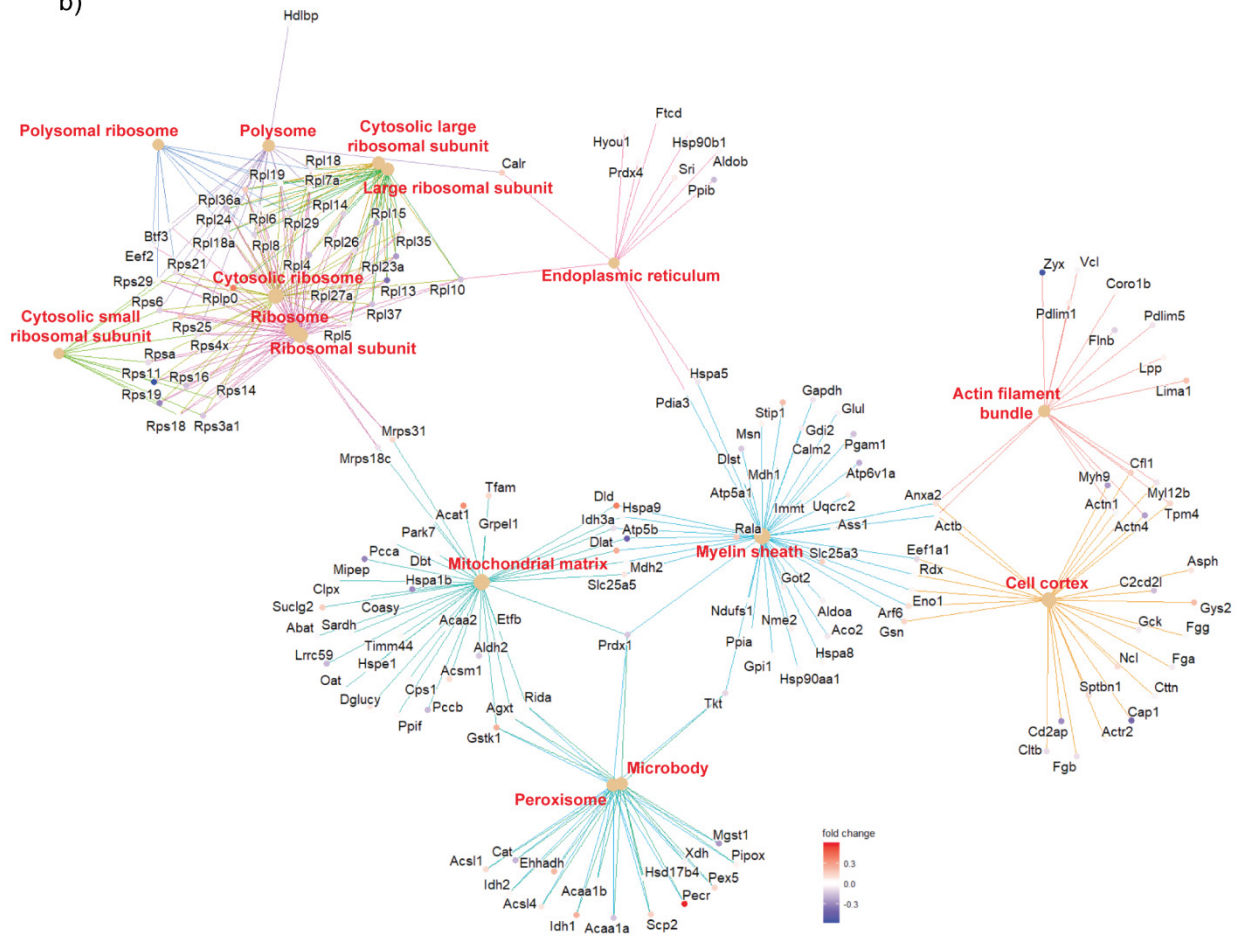

**Supplementary Figure 3.** STRING analysis of unique changes in stoichiometry of lysine acetylation.

**(a)** Gene-network plot of proteins (total of 193) harboring the acetylation sites that were significantly changed from WT and shared by SLC13A5 and SLC25A1 sTg mice. Plot constructed via an overrepresentation analysis using the GO cellular component function database. The color of each dot indicates the fold change in the stoichiometry of lysine acetylation. The top 8 categories sorted by enrichment score are shown with a filtered FDR score of 0.05.

**(b)** Gene-network plot of proteins (total of 500) harboring the acetylation sites that were significantly changed in SLC13A5 mice, as compared to SLC25A1 sTg mice. Plot constructed via an overrepresentation analysis using the GO cellular component function database. The color of each dot indicates the fold change in the stoichiometry of lysine acetylation. The top 15 categories sorted by enrichment score are shown with a filtered FDR score of 0.05.

Mice were 2 month-old when analyzed.





**Supplementary Figure 4.** Heat-maps showing the profile of the 698 acetylation sites among the cytosolic, mitochondria, nucleus, and secretory pathway fractions found in SLC13A5 sTg mice, as compared to SLC25A1 sTg mice. Mice were 2 month-old when analyzed.

a) Significant Lipids

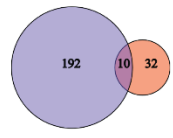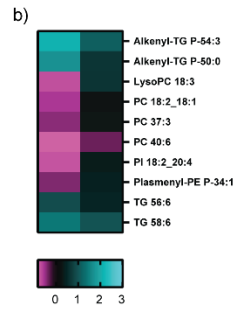

c) SLC13A5 sTg

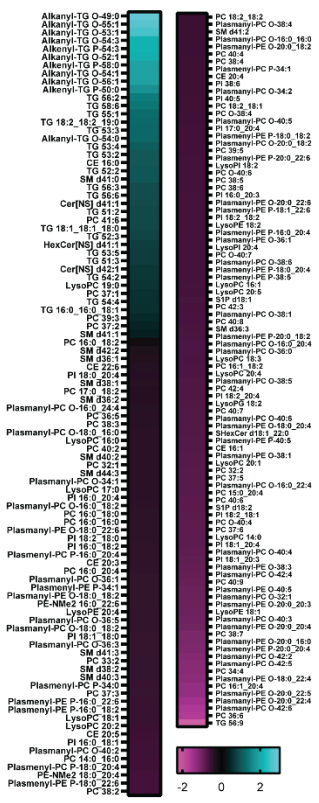

d) SLC25A1 sTg

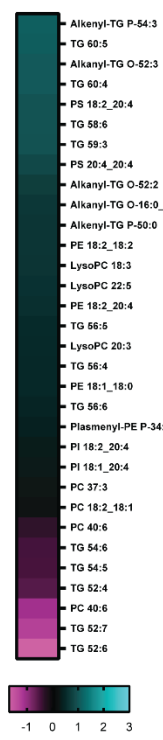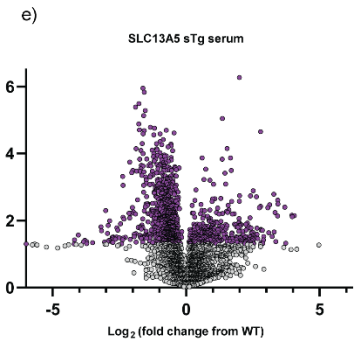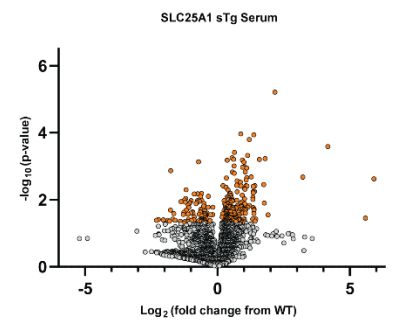

**Supplementary Figure 5.** SLC13A5 sTg and SLC25A1 sTg mice display different lipid adaptation in the serum.

**(a)** Venn diagram showing overlap between SLC13A5 sTg (purple) and SLC25A1 sTg (orange) mice across statistically significant lipids (n=5 male mice per group).

**(b)** Heat-map showing the expression profile of dysregulated lipids (total of 10) found in SLC13A5 sTg and SLC25A1 sTg mice, as compared to WT littermates.

**(c)** Heat-map showing the expression profile of dysregulated lipids (total of 192) found in SLC13A5 sTg mice, as compared to WT littermates.

**(d)** Heat-map showing the expression profile of dysregulated lipids (total of 32) found in SLC25A1 sTg mice, as compared to WT littermates.

**(e)** Volcano plots displaying all quantified lipids in SLC13A5 sTg and SLC25A1 sTg blood serum, as compared to age-matched WT littermates. Statistically significant species are highlighted in purple (for SLC13A5 sTg) and orange (for SLC25A1 sTg).  $P < 0.05$  via Fisher's method with all other species in grey.

Mice were 2 month-old when analyzed.

a) Significant Lipids

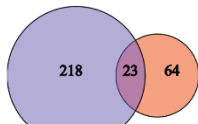

b)

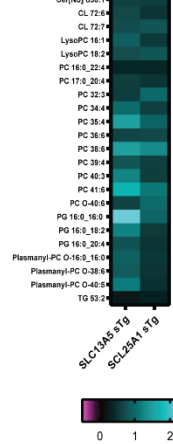

c) SLC13A5 sTg

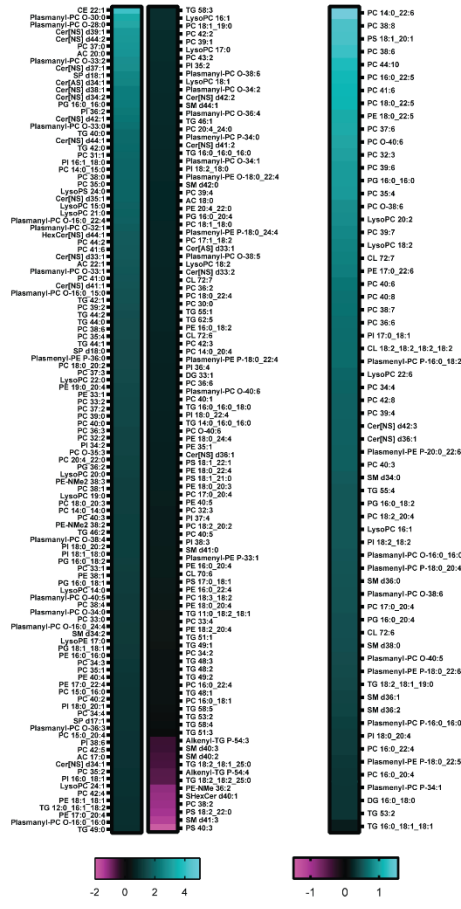

d) SLC25A1 sTg

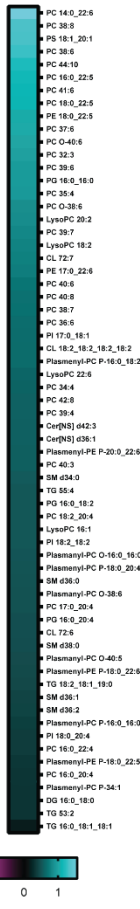

e)

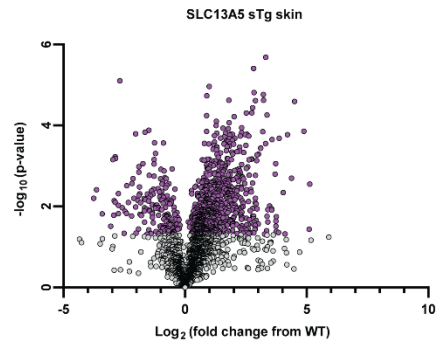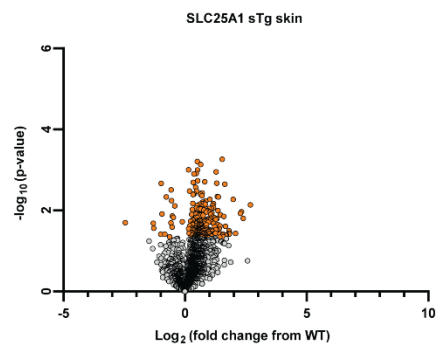

**Supplementary Figure 6.** SLC13A5 sTg and SLC25A1 sTg mice display different lipid adaptation in the skin.

**(a)** Venn diagram showing overlap between SLC13A5 sTg (purple) and SLC25A1 sTg (orange) mice across statistically significant lipids (n=5 male mice per group).

**(b)** Heat-map showing the expression profile of dysregulated lipids (total of 23) found in SLC13A5 sTg and SLC25A1 sTg mice, as compared to WT littermates.

**(c)** Heat-map showing the expression profile of dysregulated lipids (total of 218) found in SLC13A5 sTg mice, as compared to WT littermates.

**(d)** Heat-map showing the expression profile of dysregulated lipids (total of 64) found in SLC25A1 sTg mice, as compared to WT littermates.

**(e)** Volcano plots displaying all quantified lipids in SLC13A5 sTg and SLC25A1 sTg skin tissue, as compared to age-matched WT littermates. Statistically significant species are highlighted in purple (for SLC13A5 sTg) and orange (for SLC25A1 sTg).  $P < 0.05$  via Fisher's method with all other species in grey.

Mice were 2 month-old when analyzed.

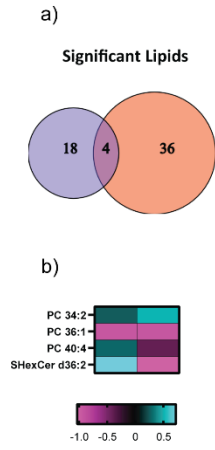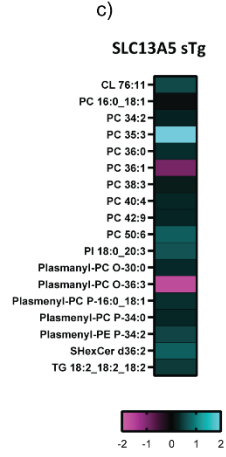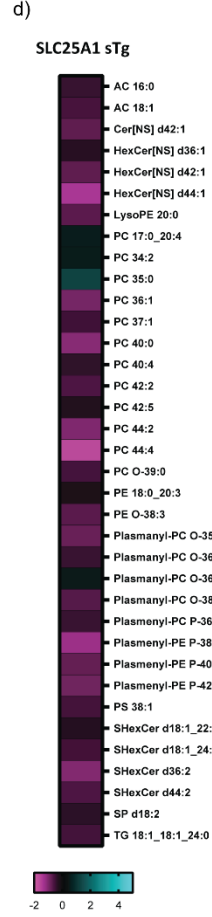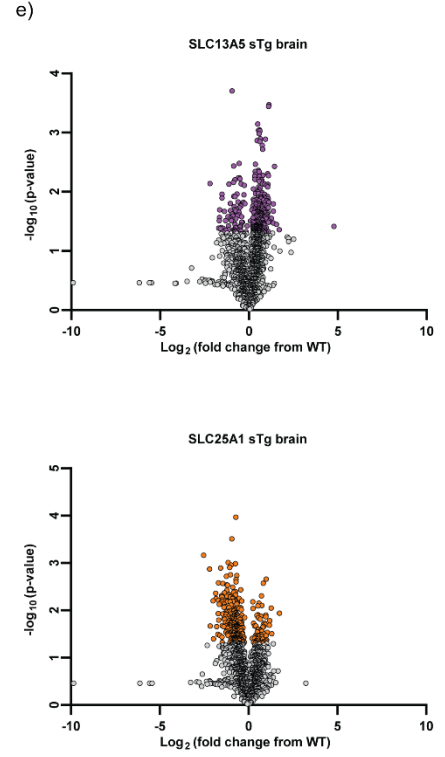

**Supplementary Figure 7.** SLC13A5 sTg and SLC25A1 sTg mice display different lipid adaptation in the brain.

**(a)** Venn diagram showing overlap between SLC13A5 sTg (purple) and SLC25A1 sTg (orange) mice across statistically significant lipids (n=5 male mice per group).

**(b)** Heat-map showing the expression profile of dysregulated lipids (total of 4) found in SLC13A5 sTg and SLC25A1 sTg mice, as compared to WT littermates.

**(c)** Heat-map showing the expression profile of dysregulated lipids (total of 18) found in SLC13A5 sTg mice, as compared to WT littermates.

**(d)** Heat-map showing the expression profile of dysregulated lipids (total of 36) found in SLC25A1 sTg mice, as compared to WT littermates.

**(e)** Volcano plots displaying all quantified lipids in SLC13A5 sTg and SLC25A1 sTg brain, as compared to age-matched WT littermates. Statistically significant species are highlighted in purple (for SLC13A5 sTg) and orange (for SLC25A1 sTg).  $P < 0.05$  via Fisher's method with all other species in grey.

Mice were 2 month-old when analyzed.

a)

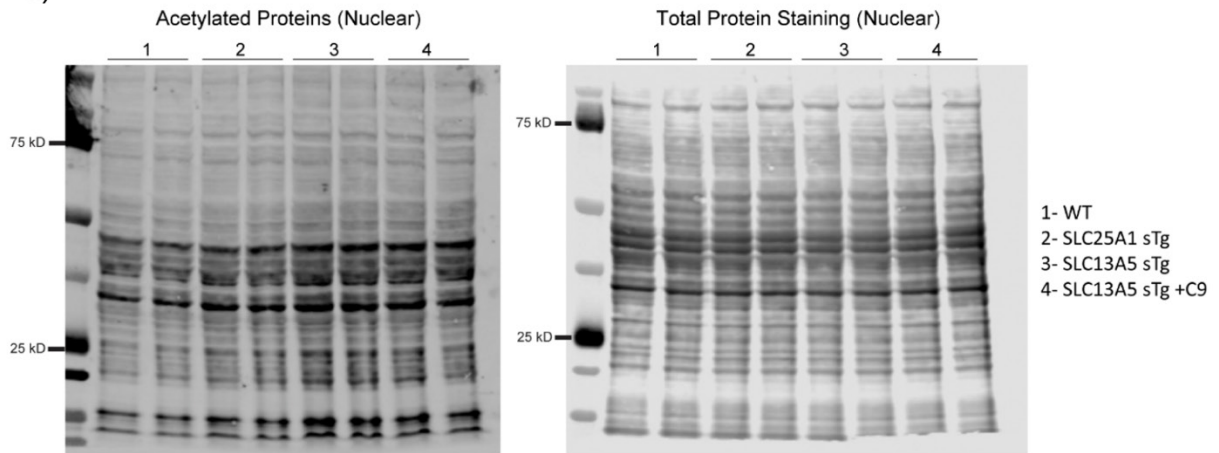

b)

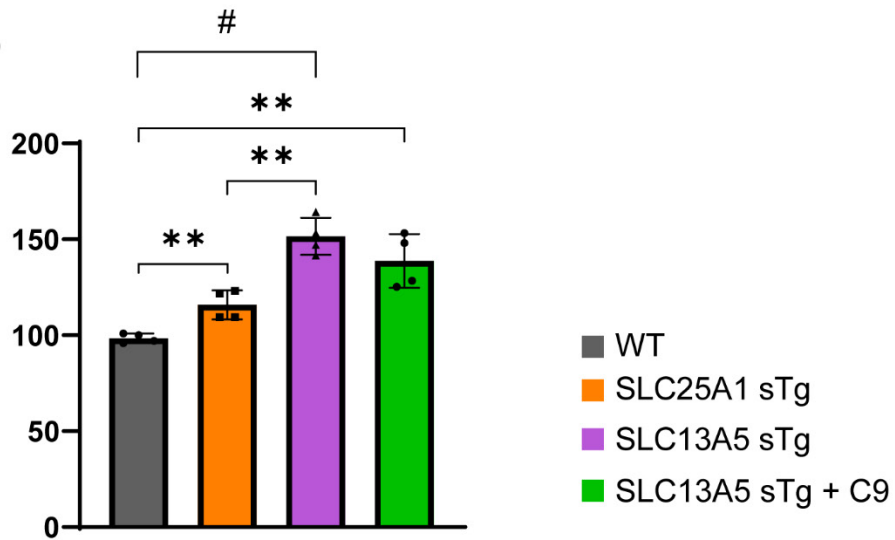

c)

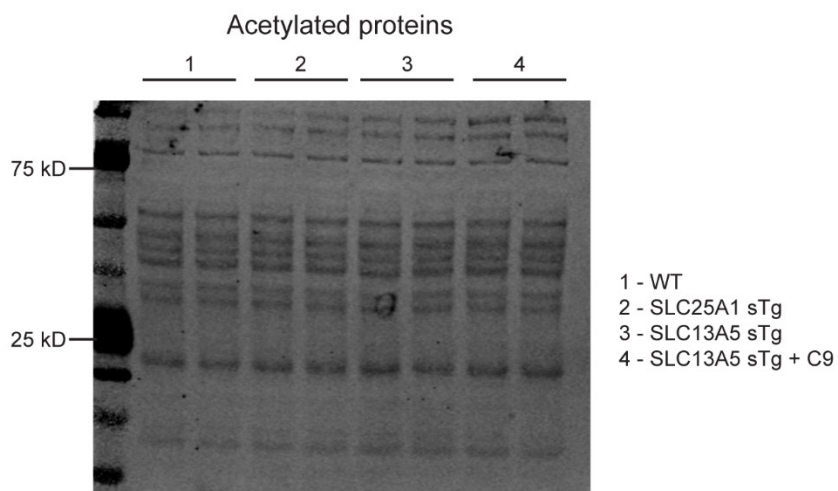



**Supplementary Figure 8.** The increased acetylation of the nucleus in SLC13A5 sTg mice is not rescued by C9.

**(a-b)** Western blot showing the profile of N $\epsilon$ -lysine acetylation in the nucleus isolated from the liver. Representative Western blot with total protein staining (a) and quantification (b) are shown. C9, Compound 9.

**(c)** Western blot showing the profile of N $\epsilon$ -lysine acetylation in the total liver lysate. C9, Compound 9.

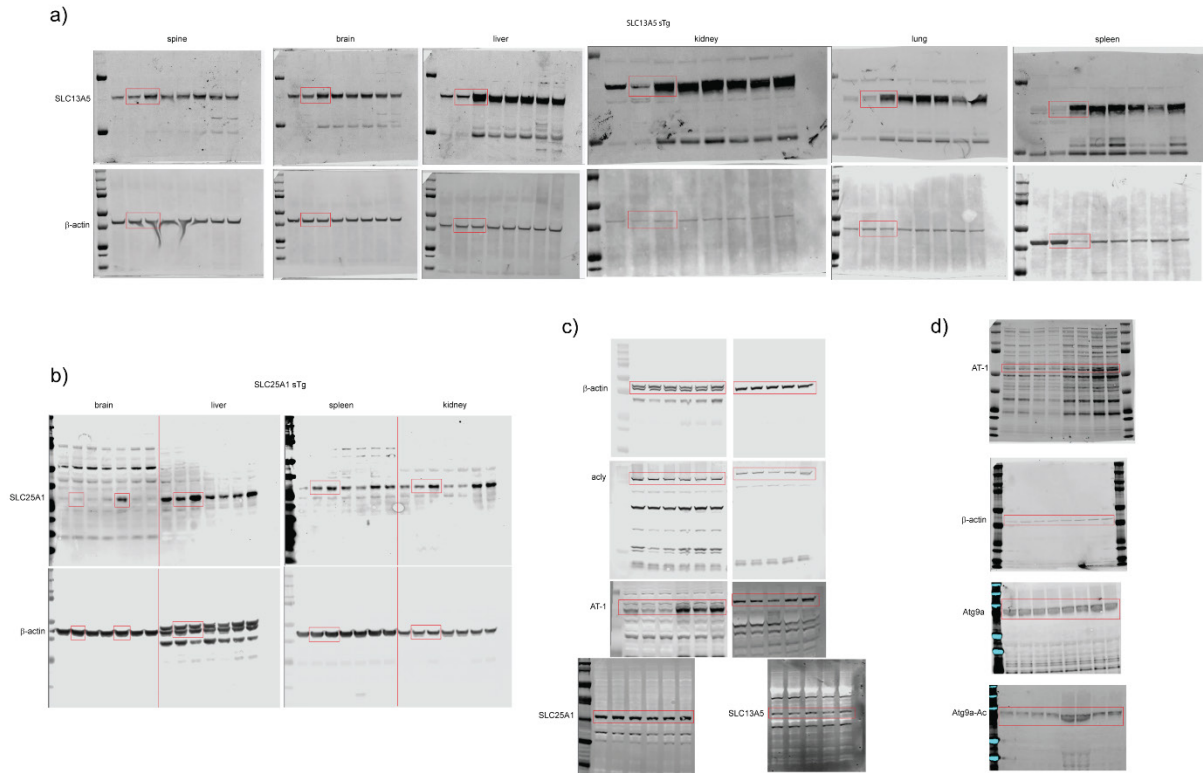

**Supplementary Figure 9.** Uncropped Western blots from Figure 1J (panel a and b), Figure 7b (panel c), Figure 7c and 7e (panel d).
