# Supplementary material for: The citrate transporters SLC13A5 and SLC25A1 elicit different metabolic responses and phenotypes in the mouse
Source: PubMed Central journal article supplement (PMC10492862; doi:10.1038/s42003-023-05311-1), 2023-09-09
Supplement: 42003_2023_5311_MOESM3_ESM.pdf [file 42003_2023_5311_MOESM3_ESM.pdf]

## **Description of Additional Supplementary Files**

**File name:** Supplementary Data 1

**Description:** The source data behind the graphs and charts in the paper.

**File name:** Supplementary Movie 1

**Description:** Phenotypic correction of the SLC13A5 phenotype by the ATase inhibitor, compound 9.
